# Supplementary material for: NONO and RALY proteins are required for YB-1 oxaliplatin induced resistance in colon adenocarcinoma cell lines
Source: Mol Cancer. 2011 Nov 25;10:145. doi: 10.1186/1476-4598-10-145 (PMC3240900; doi:10.1186/1476-4598-10-145)
Supplement: Additional file 1 — Table of the list of proteins identified by mass spectrometry in TAP-YB-1 eluate. The total number of peptides identified by LC-MS/MS for each protein is indicated on the right. [file 1476-4598-10-145-S1.XLS]

## Sheet: Additional file 1
Additional File 1. Table of the list of proteins identified by mass spectrometry in TAP-YB-1 eluate.
Protein description	Accession number	Total number of identified peptides
YBOX1_HUMAN Nuclease-sensitive element-binding protein 1 [Homo sapiens (Human) [9606]]	P67809	107
C1QBP_HUMAN Complement component 1 Q subcomponent-binding protein, mitochondrial [Homo sapiens (Human) [9606]]	Q07021	54
FBRL_HUMAN rRNA 2&apos;-O-methyltransferase fibrillarin [Homo sapiens (Human)]	P22087,Q96BS4	20
HNRPK_HUMAN Heterogeneous nuclear ribonucleoprotein K [Homo sapiens (Human)]	Q00839,Q00839-2	20
RM12_HUMAN 39S ribosomal protein L12, mitochondrial precursor [Homo sapiens (Human)]	P52815,Q96Q74	14
PABP1_HUMAN Polyadenylate-binding protein 1 (Poly(A)-binding protein 1) [Homo sapiens (Human)]	P11940,P11940-2,Q3ZCS4,Q9H361	13
HNRPR_HUMAN Heterogeneous nuclear ribonucleoprotein R [Homo sapiens (Human)]	O43390,Q0VGD6,Q6MZS5,Q9BV64,UPI00015E0B3B	12
RT29_HUMAN Mitochondrial 28S ribosomal protein S29 [Homo sapiens (Human)]	P51398	11
RM21_HUMAN 39S ribosomal protein L21, mitochondrial precursor [Homo sapiens (Human)]	Q7Z2W9	11
ODB2_HUMAN Lipoamide acyltransferase component of branched-chain alpha-keto acid dehydrogenase complex, mitochondrial precursor (EC 2.3.1.168) (Dihydrolipoyllysine-residue (2-methylpropanoyl)transferase) [Homo sapiens (Human)]	P11182,Q5VVL8	9
RM19_HUMAN 39S ribosomal protein L19, mitochondrial precursor [Homo sapiens (Human)]	P49406	9
IF2B1_HUMAN Insulin-like growth factor 2 mRNA-binding protein 1 [Homo sapiens (Human)]	Q9NZI8	9
RM15_HUMAN 39S ribosomal protein L15, mitochondrial precursor [Homo sapiens (Human)]	Q9P015	9
PTCD3_HUMAN Pentatricopeptide repeat-containing protein 3, mitochondrial precursor [Homo sapiens (Human)]	Q96EY7	8
A8K9A4_HUMAN cDNA FLJ75154, highly similar to Homo sapiens heterogeneous nuclear ribonucleoprotein C (C1/C2), mRNA [Homo sapiens (Human)]	A8K9A4,P07910,P07910-2,P07910-4	8
ILF2_HUMAN Interleukin enhancer-binding factor 2 [Homo sapiens (Human)]	Q12905,Q53FG3,UPI00001400D2	8
RT22_HUMAN Mitochondrial 28S ribosomal protein S22 [Homo sapiens (Human)]	P82650,Q59GX8,Q8NBL6	7
RM09_HUMAN 39S ribosomal protein L9, mitochondrial [Homo sapiens (Human) [9606]]	Q9BYD2	7
RM37_HUMAN 39S ribosomal protein L37, mitochondrial precursor [Homo sapiens (Human)]	Q9BZE1	7
Q53G62_HUMAN Mitochondrial ribosomal protein S28 variant [Homo sapiens (Human)]	Q53G62,Q9Y2Q9	6
RT07_HUMAN 28S ribosomal protein S7, mitochondrial [Homo sapiens (Human) [9606]]	Q9Y2R9	6
RIBC2_HUMAN RIB43A-like with coiled-coils protein 2 [Homo sapiens (Human)]	Q9H4K1	6
RM49_HUMAN Mitochondrial 39S ribosomal protein L49 [Homo sapiens (Human)]	Q13405,Q59GE9	6
RS7_HUMAN 40S ribosomal protein S7 [Homo sapiens (Human)]	P62081	5
HNRPQ_HUMAN Heterogeneous nuclear ribonucleoprotein Q [Homo sapiens (Human)]	O60506,O60506-2,O60506-4,Q05CK9,Q59GL1,Q5TCG3	5
RS4X_HUMAN 40S ribosomal protein S4, X isoform [Homo sapiens (Human)]	P62701,Q53HV1	5
RM44_HUMAN 39S ribosomal protein L44, mitochondrial precursor [Homo sapiens (Human)]	Q9H9J2	5
A8MUX6_HUMAN Uncharacterized protein MRPL27 [Homo sapiens (Human)]	A8MUX6,Q9P0M9	5
CHCH2_HUMAN Coiled-coil-helix-coiled-coil-helix domain-containing protein 2, mitochondrial precursor [Homo sapiens (Human)]	Q9Y6H1	5
A6NNK2_HUMAN Uncharacterized protein ENSP00000341467 [Homo sapiens (Human)] (RALYL)	A6NNK2,A8K9A4,A8MWM4,O60812,P07910,P07910-2,P07910-3,P07910-4,Q569J8,Q6PKD2,UPI00006C034D,UPI0000DD788B	5
RM13_HUMAN 39S ribosomal protein L13, mitochondrial [Homo sapiens (Human)]	Q9BYD1	5
RS8_HUMAN 40S ribosomal protein S8 [Homo sapiens (Human)]	P62241,Q5JR95	4
CHCH9_HUMAN Coiled-coil-helix-coiled-coil-helix domain-containing protein 9, mitochondrial [Homo sapiens (Human) [9606]]	Q5T1J5,Q9Y6H0	4
A8K476_HUMAN cDNA FLJ77093 [Homo sapiens (Human)]	A8K476,Q8IW19	4
RM38_HUMAN 39S ribosomal protein L38, mitochondrial precursor [Homo sapiens (Human)]	Q96DV4	4
A8K4V4_HUMAN cDNA FLJ76392, highly similar to Homo sapiens mitochondrial ribosomal protein L43 (MRPL43), transcript variant 1, mRNA [Homo sapiens (Human)]	A8K4V4,Q5JW12,Q86XN0	4
RM40_HUMAN 39S ribosomal protein L40, mitochondrial precursor [Homo sapiens (Human)]	Q9NQ50	4
RS24_HUMAN 40S ribosomal protein S24 [Homo sapiens (Human) [9606]]	P62847	4
RM02_HUMAN 39S ribosomal protein L2, mitochondrial precursor [Homo sapiens (Human)]	Q5T653	4
A6ND69_HUMAN Uncharacterized protein HNRNPL [Homo sapiens (Human)]	A6ND69,A6NIT8,P14866	4
ROA0_HUMAN Heterogeneous nuclear ribonucleoprotein A0 [Homo sapiens (Human)]	Q13151	3
RM48_HUMAN 39S ribosomal protein L48, mitochondrial precursor [Homo sapiens (Human)]	Q96GC5,Q96GC5-2	3
RM20_HUMAN 39S ribosomal protein L20, mitochondrial precursor [Homo sapiens (Human)]	Q9BYC9	3
Q5JW07_HUMAN Mitochondrial ribosomal protein L43 [Homo sapiens (Human)]	Q5JW07,Q5JW08,Q5JW09,Q5JW12,Q5JW13,Q5JW14,Q8N983,UPI000013E565,UPI0000167F88	3
RS29_HUMAN 40S ribosomal protein S29 [Homo sapiens (Human)]	P62273	3
A8K525_HUMAN cDNA FLJ76817, highly similar to Homo sapiens non-POU domain containing, octamer-binding (NONO), mRNA [Homo sapiens (Human)]	A8K525,Q15233	3
A8K4T9_HUMAN cDNA FLJ77421, highly similar to Homo sapiens autoantigen p542 mRNA [Homo sapiens (Human)]	A8K4T9,Q53GL6,Q5QPL9,Q5QPM0,Q86SE5,Q9UKM9,UPI00015E030C	3
DDX5_HUMAN Probable ATP-dependent RNA helicase DDX5 [Homo sapiens (Human)]	P17844,Q59E92,Q59F66,Q7Z2V5,Q92841,Q92841-2	3
RM53_HUMAN 39S ribosomal protein L53, mitochondrial precursor [Homo sapiens (Human)]	Q96EL3	3
RT05_HUMAN Mitochondrial 28S ribosomal protein S5 [Homo sapiens (Human)]	P82675	3
PREDICTED: similar to hCG36734 [Homo sapiens [9606]]	UPI0000EE61E0	2
GCS1_HUMAN Mannosyl-oligosaccharide glucosidase [Homo sapiens (Human)]	Q13724,Q58F09	2
APC2_HUMAN Adenomatous polyposis coli protein 2 [Homo sapiens (Human)]	O95996,O95996-3	2
RM16_HUMAN 39S ribosomal protein L16, mitochondrial precursor [Homo sapiens (Human)]	Q9NX20	2
A8K259_HUMAN cDNA FLJ78501, highly similar to Homo sapiens serpin peptidase inhibitor, clade H (heat shock protein 47), member 1, (collagen binding protein 1) (SERPINH1), mRNA [Homo sapiens (Human)]	A8K259,P50454	2
SRP14_HUMAN Signal recognition particle 14 kDa protein [Homo sapiens (Human)]	P37108,Q96Q14	2
RS23_HUMAN 40S ribosomal protein S23 [Homo sapiens (Human)]	P62266,UPI0000DD864F	2
A6NGQ5_HUMAN Uncharacterized protein MRPL23 [Homo sapiens (Human)]	A6NGQ5,A6NJD9,A8MT29,A8MYK1,Q16540,UPI00001678B9	2
RT31_HUMAN 28S ribosomal protein S31, mitochondrial [Homo sapiens (Human) [9606]]	Q92665	2
A6NGJ4_HUMAN Mitochondrial ribosomal protein L10, isoform CRA_b [Homo sapiens (Human) [9606]]	A6NGJ4	2
MBL2_HUMAN Mannose-binding protein C precursor [Homo sapiens (Human)]	P11226,Q4VB12,Q4VB13	2
RT14_HUMAN Mitochondrial 28S ribosomal protein S14 [Homo sapiens (Human)]	O60783	2
RS11_HUMAN 40S ribosomal protein S11 [Homo sapiens (Human)]	P62280	2
RM03_HUMAN Mitochondrial 39S ribosomal protein L3 [Homo sapiens (Human)]	P09001	2
A0PJ79_HUMAN MRPL1 protein [Homo sapiens (Human)]	A0PJ79,Q9BYD6	2
RT27_HUMAN Mitochondrial 28S ribosomal protein S27 [Homo sapiens (Human)]	Q92552	2
ECHB_HUMAN Trifunctional enzyme subunit beta, mitochondrial precursor (TP-beta) [Includes: 3-ketoacyl-CoA thiolase (EC 2.3.1.16) (Acetyl-CoA acyltransferase) (Beta-ketothiolase)] [Homo sapiens (Human)]	P55084	2
Q32P46_HUMAN Mitochondrial ribosomal protein L11 [Homo sapiens (Human)]	Q32P46,Q53G19,Q9Y3B7	2
RM55_HUMAN 39S ribosomal protein L55, mitochondrial precursor [Homo sapiens (Human)]	Q7Z7F7,Q7Z7F7-2	1
Q59GW8_HUMAN Succinate dehydrogenase complex, subunit A, flavoprotein variant [Homo sapiens (Human)]	Q59GW8,Q8IW48	1
Q53GN7_HUMAN Mitochondrial ribosomal protein S30 variant [Homo sapiens (Human)]	Q53GN7,Q53H77,Q9BUN6,Q9NP92	1
Q53F64_HUMAN Heterogeneous nuclear ribonucleoprotein AB isoform a variant [Homo sapiens (Human)]	Q53F64,Q99729,Q99729-2,Q99729-3,Q99729-4,UPI000013EBF8	1
Q2TAN5_HUMAN CYorf15A protein [Homo sapiens (Human)]	Q2TAN5,Q6ZSJ5	1
PREDICTED: similar to H2A histone family, member V isoform 2 [Homo sapiens]	UPI0000DD8319	1
PREDICTED: similar to 60S ribosomal protein L12 [Homo sapiens]	UPI00006C12EC	1
PREDICTED: hypothetical protein LOC57714 [Homo sapiens]	UPI0000DD8472	1
OST48_HUMAN Dolichyl-diphosphooligosaccharide--protein glycosyltransferase 48 kDa subunit precursor [Homo sapiens (Human)]	P39656,Q5VWA5	1
A8MXI0_HUMAN Uncharacterized protein ENSP00000383559 [Homo sapiens (Human)]	A8MXI0	1
A8MV44_HUMAN Uncharacterized protein ENSP00000380980 [Homo sapiens (Human)]	A8MV44	1
A7MBN7_HUMAN Phospholipase C, epsilon 1 [Homo sapiens (Human)]	A7MBN7,Q5VWL4,Q9P212,Q9P212-2	1
A2A398_HUMAN Regulator of telomere elongation helicase 1 [Homo sapiens (Human)]	A2A398,Q6ZNJ0,Q9NZ71,Q9NZ71-2,Q9NZ71-5	1
A0A9F3_HUMAN Prolactin-induced protein [Homo sapiens (Human)]	A0A9F3,P12273	1
A0A4Z0_HUMAN Insulin-like growth factor 2 mRNA binding protein 2 [Homo sapiens (Human)]	A0A4Z0,O00425,Q9Y6M1	1
A6NGJ8_HUMAN cDNA FLJ55384, highly similar to Homo sapiens mitochondrial ribosomal protein L22 (MRPL22), transcript variant 1, mRNA [Homo sapiens (Human) [9606]]	A6NGJ8	1
A1A508_HUMAN PRSS3 protein [Homo sapiens (Human) [9606]]	A1A508	1
THOC4_HUMAN THO complex subunit 4 [Homo sapiens (Human)]	Q86V81	1
TADBP_HUMAN TAR DNA-binding protein 43 [Homo sapiens (Human)]	Q13148,Q53H27	1
SYYM_HUMAN Tyrosyl-tRNA synthetase, mitochondrial precursor [Homo sapiens (Human)]	Q9Y2Z4	1
SMG1_HUMAN Serine/threonine-protein kinase SMG1 [Homo sapiens (Human)]	Q96Q15,UPI00004F8E22,UPI00015DFBDF	1
RS13_HUMAN 40S ribosomal protein S13 [Homo sapiens (Human)]	P62277	1
RIB1_HUMAN Dolichyl-diphosphooligosaccharide--protein glycosyltransferase 67 kDa subunit precursor [Homo sapiens (Human)]	P04843,Q53EP4,Q6IBR0	1
Q96HG1_HUMAN LOC644538 protein [Homo sapiens (Human)]	Q96HG1	1
Q8NI83_HUMAN OK/SW-CL.19 [Homo sapiens (Human)]	Q8NI83,Q9HAS0,UPI00015DFB01	1
Q8IW23_HUMAN Similar to glutamate receptor, ionotropic, N-methyl D-aspartate 2C [Homo sapiens (Human)]	Q8IW23	1
Q7Z657_HUMAN Putative uncharacterized protein DKFZp779O175 [Homo sapiens (Human)]	Q7Z657	1
Q6ZP68_HUMAN CDNA FLJ26443 fis, clone KDN02432 [Homo sapiens (Human)]	Q6ZP68	1
Q6RAR7_HUMAN Microcephalin [Homo sapiens (Human)]	Q6RAR7,Q6RAS2,Q6RAS3,Q6W788	1
Q6P2G8_HUMAN TTMB protein [Homo sapiens (Human)]	Q6P2G8	1
Q5T1N0_HUMAN Chromosome 1 open reading frame 62 [Homo sapiens (Human)]	Q5T1N0,Q5T1N1,Q5T1N2,Q8N990,UPI0000246CED	1
Q5STN0_HUMAN Mitochondrial ribosomal protein S18B [Homo sapiens (Human)]	Q5STN0,Q6ZTX5,Q9Y676	1
Q5HYM3_HUMAN Oxysterol-binding protein [Homo sapiens (Human)]	Q5HYM3,Q641R2,Q68D75,Q9BZF1,Q9BZF1-2,UPI00015DFF37	1
Q12771_HUMAN P37 AUF1 [Homo sapiens (Human)]	Q12771,Q14103,Q14103-2,Q14103-3,Q14103-4,UPI0000D6158B	1
Q0VG94_HUMAN C9orf66 protein [Homo sapiens (Human)]	Q0VG94,Q5T8R8	1
Q0D2I5_HUMAN Putative uncharacterized protein HOM-TES-103 [Homo sapiens (Human)]	Q0D2I5,Q24JT6,Q5TF57,Q5TF58,Q63HK6,Q6P593,Q7L5J9,Q9NWP4	1
PDIA6_HUMAN Protein disulfide-isomerase A6 precursor [Homo sapiens (Human)]	Q15084,Q15084-2	1
ODP2_HUMAN Dihydrolipoyllysine-residue acetyltransferase component of pyruvate dehydrogenase complex, mitochondrial precursor [Homo sapiens (Human)]	P10515,Q01991,Q53EP3,Q86YI5,UPI0000D4E397	1
MCM7_HUMAN DNA replication licensing factor MCM7 [Homo sapiens (Human)]	A4D2A2,P33993	1
K1967_HUMAN Protein KIAA1967 [Homo sapiens (Human)]	Q8N163,Q8N163-2	1
HECD1_HUMAN E3 ubiquitin-protein ligase HECTD1 [Homo sapiens (Human)]	Q9ULT8,UPI0000E8AC98,UPI00015DFD38	1
FYCO1_HUMAN FYVE and coiled-coil domain-containing protein 1 [Homo sapiens (Human)]	Q9BQS8	1
DHE3_HUMAN Glutamate dehydrogenase 1, mitochondrial precursor [Homo sapiens (Human)]	P00367,P49448,Q53GW3,UPI0000DD8038	1
CP2R1_HUMAN Cytochrome P450 2R1 [Homo sapiens (Human)]	Q6VVX0	1
CKAP4_HUMAN Cytoskeleton-associated protein 4 [Homo sapiens (Human)]	Q07065,Q07065-2,Q6NWZ1,Q8TB01	1
B1AHD1_HUMAN NHP2 non-histone chromosome protein 2-like 1 [Homo sapiens (Human)]	B1AHD1,P55769	1
A8MUH2_HUMAN Uncharacterized protein ATP5J [Homo sapiens (Human)]	A8MUH2,P18859,Q6NZ59	1
A8K8A6_HUMAN cDNA FLJ76931, highly similar to Homo sapiens testes-specific heterogenous nuclear ribonucleoprotein G-T, mRNA [Homo sapiens (Human)]	A8K8A6,O75526,P38159,Q5T9T9,Q96E39,UPI000013EBA5	1
A8K7F6_HUMAN cDNA FLJ78244, highly similar to Homo sapiens eukaryotic translation initiation factor 4A, isoform 1 (EIF4A1), mRNA [Homo sapiens (Human)]	A8K7F6,P60842,Q14240,Q14240-2,Q96B07,Q9BRB1,Q9NZE6,UPI00015DFAB2	1
A8K6Q8_HUMAN cDNA FLJ75881, highly similar to Homo sapiens transferrin receptor (p90, CD71) (TFRC), mRNA [Homo sapiens (Human)]	A8K6Q8,P02786	1
A8K6G2_HUMAN cDNA FLJ76305, highly similar to Homo sapiens RecQ protein-like (DNA helicase Q1-like) (RECQL), transcript variant 1, mRNA (RecQ protein- like (DNA helicase Q1-like), isoform CRA_a) [Homo sapiens (Human)]	A8K6G2,A8MUG3,P46063	1
A8K630_HUMAN cDNA FLJ78048, highly similar to Homo sapiens torsin A interacting protein 1, mRNA [Homo sapiens (Human)]	A8K630,Q5JTV5,Q5JTV8	1
A7E228_HUMAN ZNF536 protein [Homo sapiens (Human)]	A7E228,O15090	1
A6QKW0_HUMAN SHINC3 [Homo sapiens (Human)]	A6QKW0,P57088	1
A6NN01_HUMAN Uncharacterized protein H2AFV [Homo sapiens (Human)]	A6NN01,A8MQC5,P04908,P0C0S5,P0C0S8,P16104,P20671,Q16777,Q6FI13,Q71UI9,Q7L7L0	1
A6NL98_HUMAN Uncharacterized protein GIPC1 (GIPC PDZ domain containing family, member 1, isoform CRA_b) (cDNA FLJ76166, highly similar to Homo sapiens GIPC PDZ domain containing family, member 1 (GIPC1), transcript variant 2, mRNA) [Homo sapiens (Human)]	A6NL98,A8K2I7,O14908	1
A5D906_HUMAN TUBB2A protein [Homo sapiens (Human)]	A5D906,A5D907,P07437,Q13509,Q13885,Q53G92,Q5JP53,Q6LC01,Q7KZS6,Q9BVA1	1
A4UCT1_HUMAN Glyceraldehyde 3-phosphate dehydrogenase [Homo sapiens (Human)]	A4UCT1,P04406,Q2TSD0	1
A2T926_HUMAN Thymopoietin zeta isoform [Homo sapiens (Human)]	A2T926,P42166,P42167,Q59G12	1
A0PJI9_HUMAN C10orf12 protein [Homo sapiens (Human)]	A0PJI9,Q8N655	1
B4DYP2_HUMAN cDNA FLJ52806, highly similar to Trifunctional enzyme subunit alpha, mitochondrial [Homo sapiens (Human) [9606]]	B4DYP2	1
