# Supplementary material for: NONO and RALY proteins are required for YB-1 oxaliplatin induced resistance in colon adenocarcinoma cell lines
Source: Mol Cancer. 2011 Nov 25;10:145. doi: 10.1186/1476-4598-10-145 (PMC3240900; doi:10.1186/1476-4598-10-145)
Supplement: Additional file 5 — Microarray data showing high expression of YBX1, NONO, or RALY mRNAs in different sets of cancer patients with poor outcome of the disease. The table gives a list of microarray data set showing an association between poor outcomes of cancer patients with high expression of YB-1, NONO, and/or RALY transcripts. The cancer type, the probe for each transcript, and the array type used in the studies are provided with P-values for the association. Highlighted are studies showing co-expression of the three different genes. [file 1476-4598-10-145-S5.XLS]

## Sheet: Additional file 5
Additionnal file 5. Microarray data showing high expression of YBX1, NONO, or RALY mRNAs in different sets of cancer patients with poor outcome of the disease.
ID_NAME	DATASET	CANCER TYPE	SUBTYPE	ENDPOINT	COHORT	ARRAY TYPE	PROBE ID	MINIMUM P-VALUE	CORRECTED P-VALUE	COX P-VALUE
YBX1	GSE2837	Head and neck cancer	Squamous cell carcinoma	Relapse Free Survival	VUMC, VAMC, UTMDACC (1992-2005)	U133_X3P	Hs.74497.2.S1_3p_at	0.0659865	-	0.0117031
YBX1	GSE16560	Prostate cancer		Overall Survival	Sweden (1977-1999)	6K DASL	DAP4_5981	0.00131509	0.0320378	0.0112479
YBX1	GSE8841	Ovarian cancer		Overall Survival	Milan (1992-2003)	G4100A	8379	0.00410438	0.0809635	0.0445151
YBX1	DUKE-OC	Ovarian cancer		Overall Survival	Duke	HG-U133A	216940_x_at	0.000463117	0.0132715	0.061825
RALY	DUKE-OC	Ovarian cancer		Overall Survival	Duke	HG-U133A	208725_at	0.0113502	0.177529	0.00029768
RALY	GSE9891	Ovarian cancer		Overall Survival	AOCS, RBH, WH, NKI-AVL (1992-2006)	HG-U133_Plus_2	208725_at	0.000379822	0.011196	0.0334467
YBX1	GSE13213	Lung cancer	Adenocarcinoma	Overall Survival	Nagoya (1995-1999, 2002-2004)	G4112F	A_23_P34767	0.00263072	0.0566412	0.0179981
NONO	GSE13213	Lung cancer	Adenocarcinoma	Overall Survival	Nagoya (1995-1999, 2002-2004)	G4112F	A_24_P413437	0.000422595	0.0122702	0.0130741
RALY	jacob-00182-UM	Lung cancer	Adenocarcinoma	Overall Survival	UM	HG-U133A	208725_at	0.00246313	0.0536927	0.0499243
YBX1	GSE5287	Bladder cancer		Overall Survival	Aarhus (1995-2004)	HG-U133A	208628_s_at	0.00122694	0.030239	0.0803642
RALY	GSE13507	Bladder cancer		Overall Survival	CNUH	Human-6 v2	ILMN_1690610	0.000700116	0.0188693	0.0193416
RALY	GSE13507	Bladder cancer	Transitional cell carcinoma	Disease Specific Survival	CNUH	Human-6 v2	ILMN_1690610	4.4288e-05	0.00170188	0.00152575
NONO	GSE4271-GPL97	Brain cancer	Astrocytoma	Overall Survival	MDA	HG-U133B	200057_s_at	6.7694e-05	0.00248114	0.599871
RALY	GSE4271-GPL96	Brain cancer	Astrocytoma	Overall Survival	MDA	HG-U133A	201271_s_at	1.48106e-05	0.000637239	0.14141
RALY	GSE4271-GPL96	Brain cancer	Astrocytoma	Overall Survival	MDA	HG-U133A	208725_at	0.00339345	0.0695541	0.0227973
RALY	GSE4412-GPL96	Brain cancer	Glioma	Overall Survival	UCLA (1996-2003)	HG-U133A	201271_s_at	4.1101e-05	0.00159227	0.141136
YBX1	GSE2658	Blood cancer	Multiple myeloma	Disease Specific Survival	Arkansas	HG-U133_Plus_2	208628_s_at	0.0100358	0.161895	0.044702
NONO	GSE2658	Blood cancer	Multiple myeloma	Disease Specific Survival	Arkansas	HG-U133_Plus_2	200057_s_at	0.0010753	0.0270838	0.00791919
NONO	GSE2658	Blood cancer	Multiple myeloma	Disease Specific Survival	Arkansas	HG-U133_Plus_2	210470_x_at	1.62773e-08	1.17121e-06	0.00237601
NONO	GSE2658	Blood cancer	Multiple myeloma	Disease Specific Survival	Arkansas	HG-U133_Plus_2	208698_s_at	2.08022e-06	0.000106737	0.000471517
RALY	GSE12417-GPL570	Blood cancer	AML	Overall Survival	AMLCG (2004)	HG-U133_Plus_2	208725_at	0.00225642	0.0499923	0.197128
YBX1	GSE1456-GPL96	Breast cancer		Disease Specific Survival	Stockholm (1994-1996)	HG-U133A	208628_s_at	0.00148478	0.0354337	0.0651478
NONO	GSE1456-GPL96	Breast cancer		Disease Specific Survival	Stockholm (1994-1996)	HG-U133A	210470_x_at	4.96028e-05	0.00188258	0.00687031
NONO	GSE1456-GPL96	Breast cancer		Disease Specific Survival	Stockholm (1994-1996)	HG-U133A	208698_s_at	3.49002e-05	0.00137597	0.0366531
RALY	GSE1456-GPL96	Breast cancer		Disease Specific Survival	Stockholm (1994-1996)	HG-U133A	201271_s_at	0.00463885	0.0892109	0.0332465
NONO	GSE1456-GPL96	Breast cancer		Relapse Free Survival	Stockholm (1994-1996)	HG-U133A	208698_s_at	0.000898927	0.0233029	0.184781
NONO	GSE1456-GPL96	Breast cancer		Relapse Free Survival	Stockholm (1994-1996)	HG-U133A	210470_x_at	0.00202573	0.045772	0.0662675
RALY	GSE1456-GPL96	Breast cancer		Relapse Free Survival	Stockholm (1994-1996)	HG-U133A	201271_s_at	0.000141889	0.00476247	0.0141145
NONO	GSE1456-GPL96	Breast cancer		Overall Survival	Stockholm (1994-1996)	HG-U133A	210470_x_at	0.000402273	0.0117622	0.0231846
YBX1	GSE3143	Breast cancer		Overall Survival	Duke	HG-U95A	32340_s_at	0.00141273	0.034002	0.0239864
RALY	GSE3143	Breast cancer		Overall Survival	Duke	HG-U95A	39368_at	0.00138731	0.0334932	0.0952962
YBX1	GSE3494-GPL96	Breast cancer		Disease Specific Survival	Uppsala (1987-1989)	HG-U133A	208628_s_at	0.00727979	0.126791	0.0295972
NONO	GSE3494-GPL96	Breast cancer		Disease Specific Survival	Uppsala (1987-1989)	HG-U133A	208698_s_at	2.9945e-05	0.00119984	0.0151178
NONO	GSE3494-GPL96	Breast cancer		Disease Specific Survival	Uppsala (1987-1989)	HG-U133A	210470_x_at	5.49373e-06	0.000259332	0.0112544
NONO	GSE3494-GPL96	Breast cancer		Disease Specific Survival	Uppsala (1987-1989)	HG-U133A	200057_s_at	8.1534e-06	0.000371302	0.00277382
RALY	GSE3494-GPL96	Breast cancer		Disease Specific Survival	Uppsala (1987-1989)	HG-U133A	201271_s_at	5.1122e-05	0.00193378	0.000196502
RALY	GSE3494-GPL96	Breast cancer		Disease Specific Survival	Uppsala (1987-1989)	HG-U133A	208725_at	1.66572e-05	0.000708457	0.00116973
NONO	GSE4922-GPL96	Breast cancer		Disease Free Survival	Uppsala (1987-1989)	HG-U133A	200057_s_at	0.000254423	0.00792208	0.000535702
NONO	GSE4922-GPL96	Breast cancer		Disease Free Survival	Uppsala (1987-1989)	HG-U133A	210470_x_at	4.02609e-06	0.000195336	0.00308811
NONO	GSE4922-GPL96	Breast cancer		Disease Free Survival	Uppsala (1987-1989)	HG-U133A	208698_s_at	1.8843e-06	9.74732e-05	0.0177201
RALY	GSE4922-GPL96	Breast cancer		Disease Free Survival	Uppsala (1987-1989)	HG-U133A	208725_at	1.63234e-05	0.000695649	0.00483793
RALY	GSE4922-GPL96	Breast cancer		Disease Free Survival	Uppsala (1987-1989)	HG-U133A	201271_s_at	0.00311051	0.0648537	0.00192294
NONO	GSE3494-GPL97	Breast cancer		Disease Specific Survival	Uppsala (1987-1989)	HG-U133B	200057_s_at	4.21336e-05	0.00162789	0.00251373
NONO	GSE1456-GPL97	Breast cancer		Disease Specific Survival	Stockholm (1994-1996)	HG-U133B	200057_s_at	0.00106352	0.0268351	0.0325899
NONO	GSE1456-GPL97	Breast cancer		Relapse Free Survival	Stockholm (1994-1996)	HG-U133B	200057_s_at	9.04065e-05	0.00320435	0.104047
NONO	GSE4922-GPL97	Breast cancer		Disease Free Survival	Uppsala (1987-1989)	HG-U133B	200057_s_at	5.74166e-05	0.00214399	0.00226143
NONO	GSE9195	Breast cancer		Distant Metastasis Free Survival	GUYT2	HG-U133_Plus_2	200057_s_at	0.0028143	0.0598218	0.0430844
NONO	GSE9195	Breast cancer		Distant Metastasis Free Survival	GUYT2	HG-U133_Plus_2	210470_x_at	0.0129055	0.195263	0.0446648
NONO	GSE9893	Breast cancer		Overall Survival	Montpellier, Bordeaux, Turin (1989-2001)	MLRG Human 21K V12.0	11379	0.000385147	0.0113308	0.00356253
RALY	GSE6532-GPL570	Breast cancer		Distant Metastasis Free Survival	GUYT	HG-U133_Plus_2	208725_at	0.00623038	0.11241	0.0043103
RALY	GSE7378	Breast cancer		Disease Free Survival	UCSF	U133AAofAv2	201271_s_at	0.0328784	0.376526	0.0415808
RALY	GSE7390	Breast cancer		Relapse Free Survival	Uppsala, Oxford, Stockholm, IGR, GUYT, CRH (1980-1998)	HG-U133A	201271_s_at	0.00649799	0.116139	0.0468645
RALY	GSE2034	Breast cancer		Distant Metastasis Free Survival	Rotterdam (1980-1995)	HG-U133A	208725_at	0.00390072	0.0777495	0.0327822
YBX1	GSE19234	Skin cancer	Melanoma	Overall Survival	NYU	HG-U133_Plus_2	208628_s_at	0.000134763	0.0045522	0.0105745
YBX1	GSE19234	Skin cancer	Melanoma	Overall Survival	NYU	HG-U133_Plus_2	216940_x_at	0.00108794	0.0273499	0.0127051
RALY	GSE19234	Skin cancer	Melanoma	Overall Survival	NYU	HG-U133_Plus_2	208725_at	0.00367176	0.0740854	0.0119607
Arrays showing co-expression of at least two proteins are highlighted.
